# Supplementary material
Source: PubMed Central journal article supplement (PMC6540110)

**SF 1. Heat map showing the tumor growth inhibition**

**(TGI) of six metabolic inhibitors in PDX panel.** ND denotes anti-tumor efficacy was not determined in respective PDX.

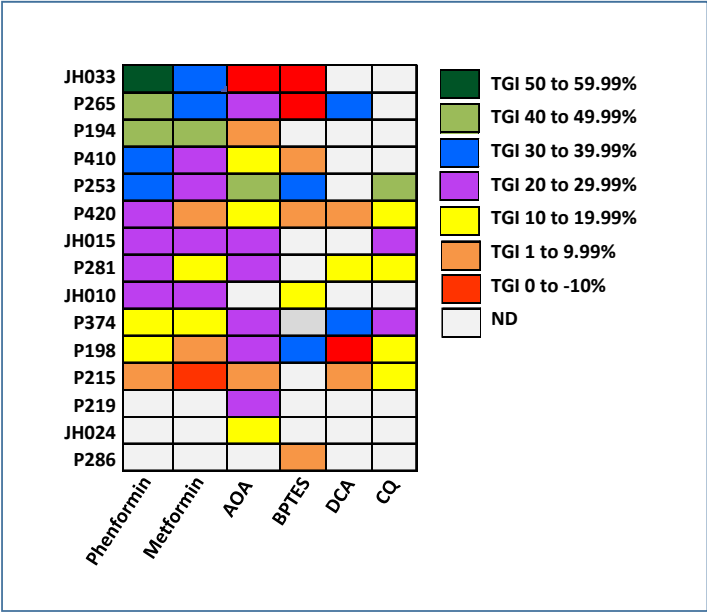

**SF 2. Tumor growth curves of PDXs treated with phenformin.** Tumor harboring animals were administered with vehicle (control) or phenformin as described in Materials and Methods. Error bars represent mean  $\pm$  standard error of mean (SEM). \*\*\*\*  $p < 0.0001$ , \*\*  $p < 0.01$ , \*  $p < 0.05$ .

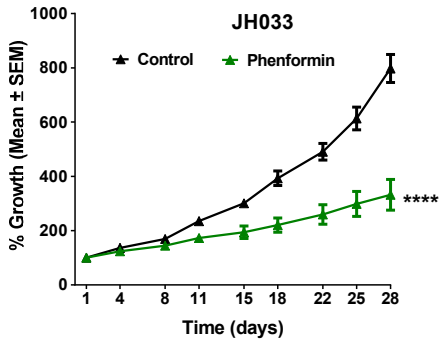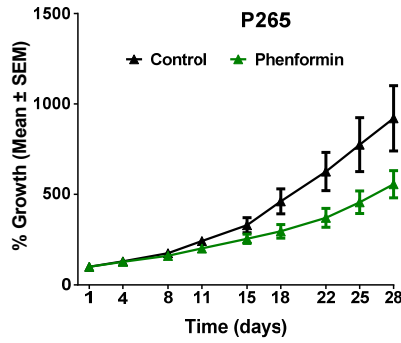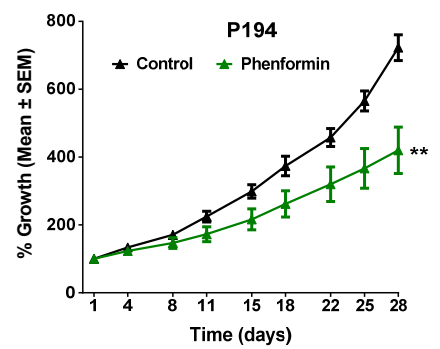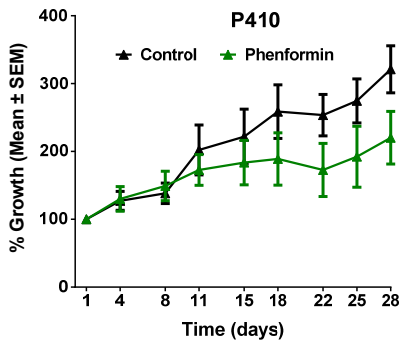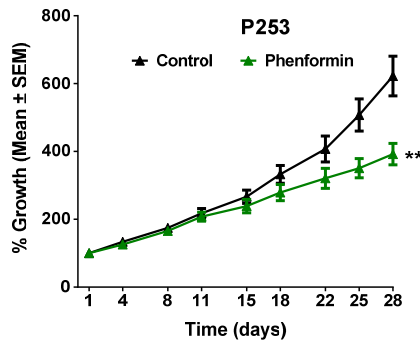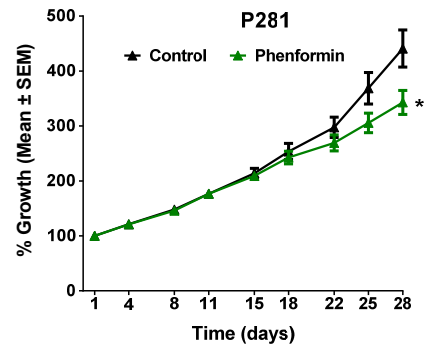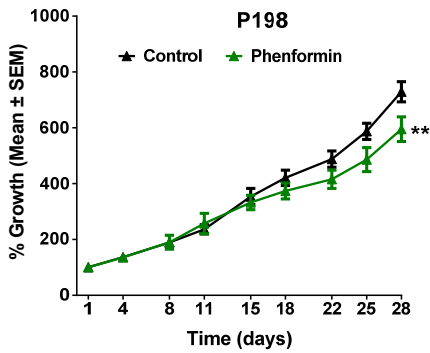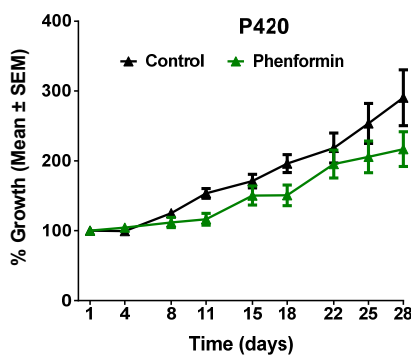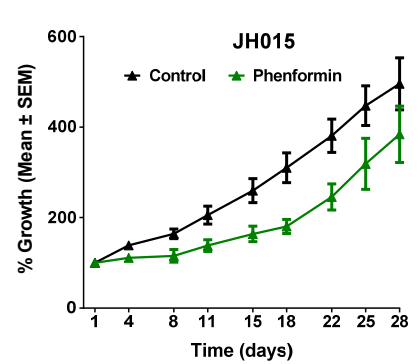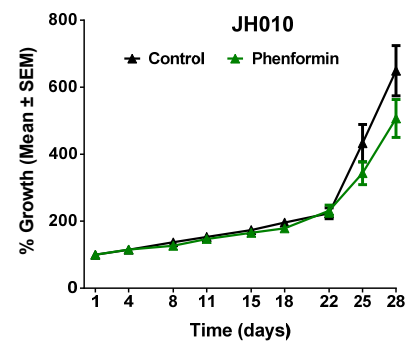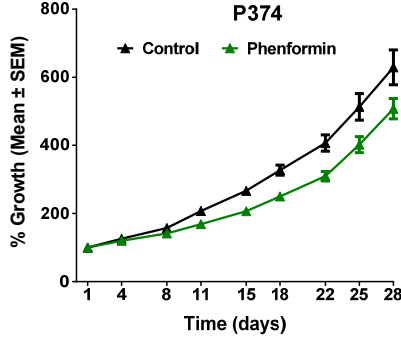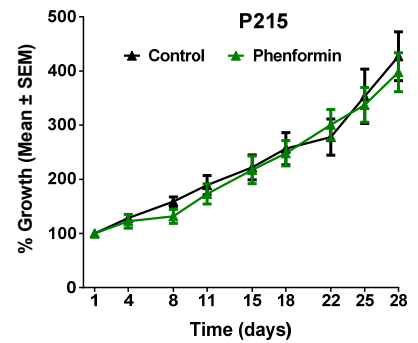

**SF 3. Tumor doubling time of 12 individual PDXs.** Tumor harboring animals were administered with vehicle (control) or phenformin as described in Materials and Methods. Error bars represent mean  $\pm$  standard error of mean (SEM). Asterisk mark denotes statistically significant tumor doubling time compared to vehicle treatment..

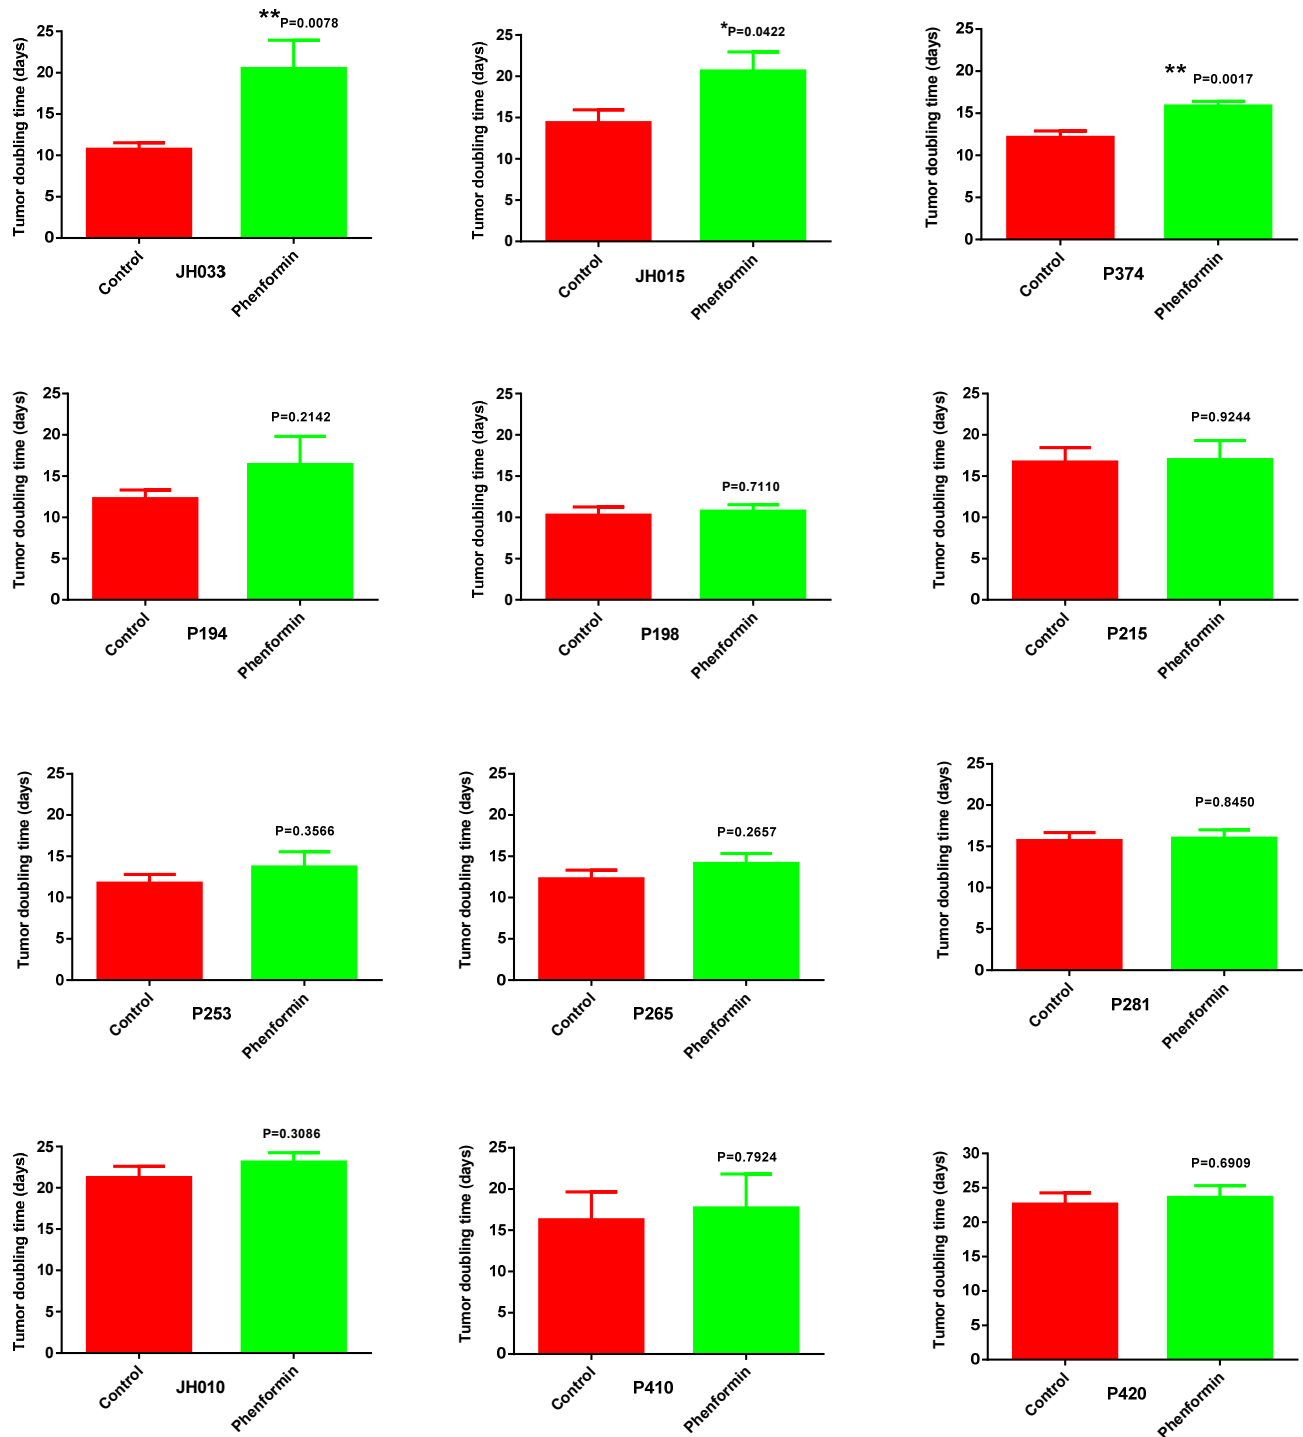

#### SF 4. Aggregate tumor doubling time of PDXs treated with vehicle or

**phenformin.** **A.** PDXs with relatively higher baseline tumor growth rates showed better TGIs with phenformin treatment compared to PDXs with slower tumor growth rates. Aggregate baseline tumor doubling time (TDT) was  $17.42 \pm 1.993$  days in 5 PDXs which showed non-significant TGI (P420, JH015, JH010, P374 and P215) to phenformin treatment. However, TDT was  $12.77 \pm 0.8833$  days in the PDXs which showed statistically significant TGI (JH033, P265, P194, P410, P253, P281 and P198) to phenformin treatment. **B.** Aggregate tumor doubling time of all tumors of control and phenformin treatment in 12 PDXs. Phenformin treatment prolongs the tumor doubling time of PDXs. Error bars represent mean  $\pm$  standard error of mean (SEM). Asterisk marks denotes statistical significance.

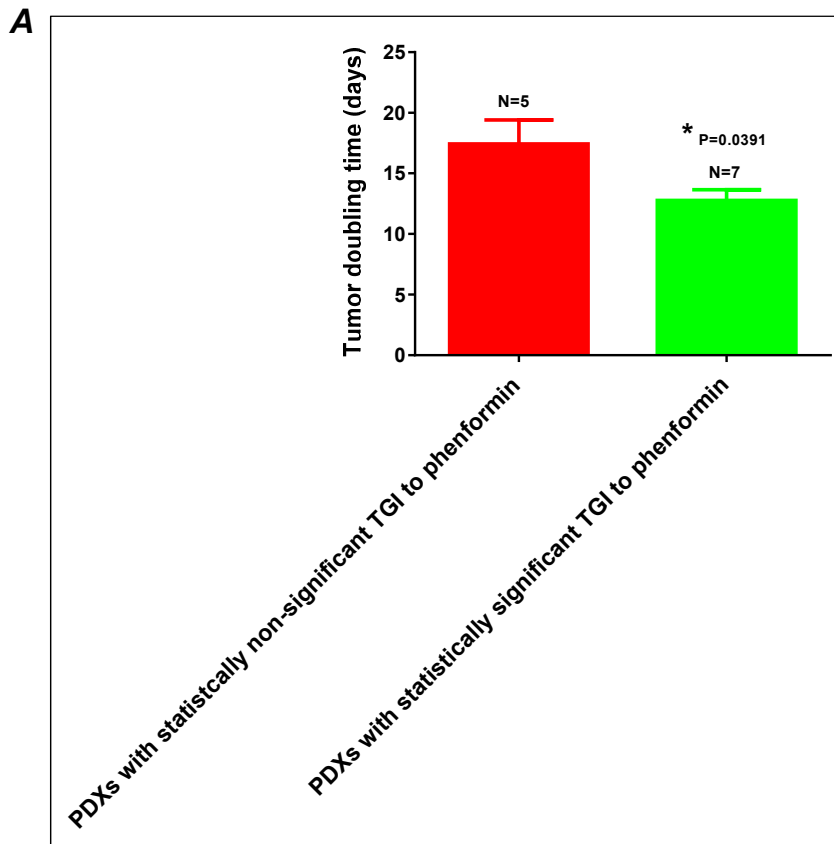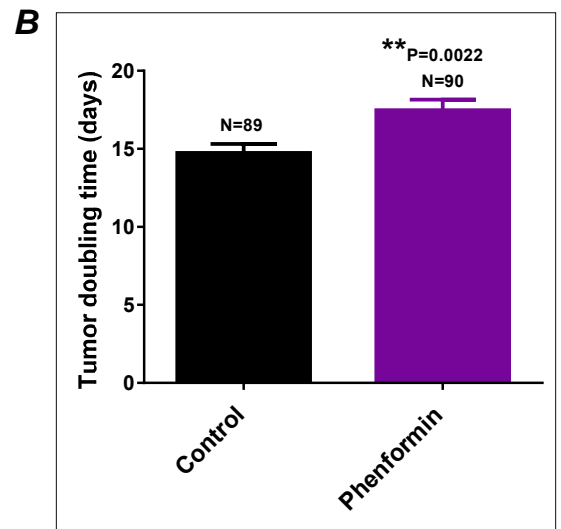

Supplement: NIHMS1019703-supplement-Suppl.pdf [file NIHMS1019703-supplement-Suppl.pdf]
